# Supplementary material for: Correlation between Physical Properties of 12-Hydroxystearic Acid Organogels and Hansen Solubility Parameters
Source: MDPI journal article supplement (doi:10.3390/gels9040314), 2023-04-07
Supplement: s1 [file s1]

Article

# Correlation between Physical Properties of 12-Hydroxystearic Acid Organogels and Hansen Solubility Parameters

Yuya Murakami <sup>1,\*</sup>, Taisei Uchiyama <sup>2</sup> and Atsushi Shono <sup>1</sup>

<sup>1</sup> Department of Industrial Chemistry, Faculty of Engineering, Tokyo University of Science, 6-3-1, Nijuku, Katsushika-ku, Tokyo 125-8585, Japan

<sup>2</sup> Institute of Innovative Research, Tokyo Institute of Technology, 2-12-1, Ookayama, Meguro-ku, Tokyo 152-8550, Japan

\* Correspondence: y.murakami@ci.tus.ac.jp; Tel.: +81-3-5876-1717

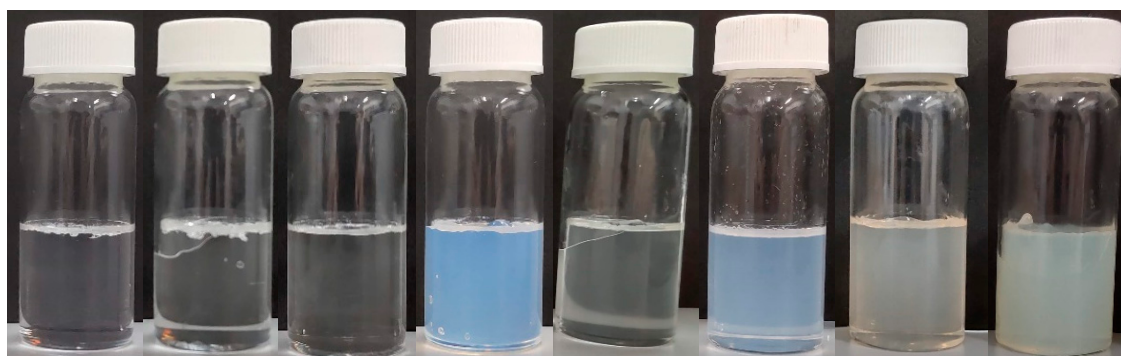

**Figure S1.** Appearance of prepared gels with 1.0 wt% of 12HSA with various solvents (diameter of vial is 34.0 mm): (a) o-Xylene, (b) m-Xylene, (c) p-Xylene, (d) Styrene, (e) n-Butylbenzene, (f) Di-Isononyl Adipate, (g) Fluorobenzene, (h) 2-Methylfuran.

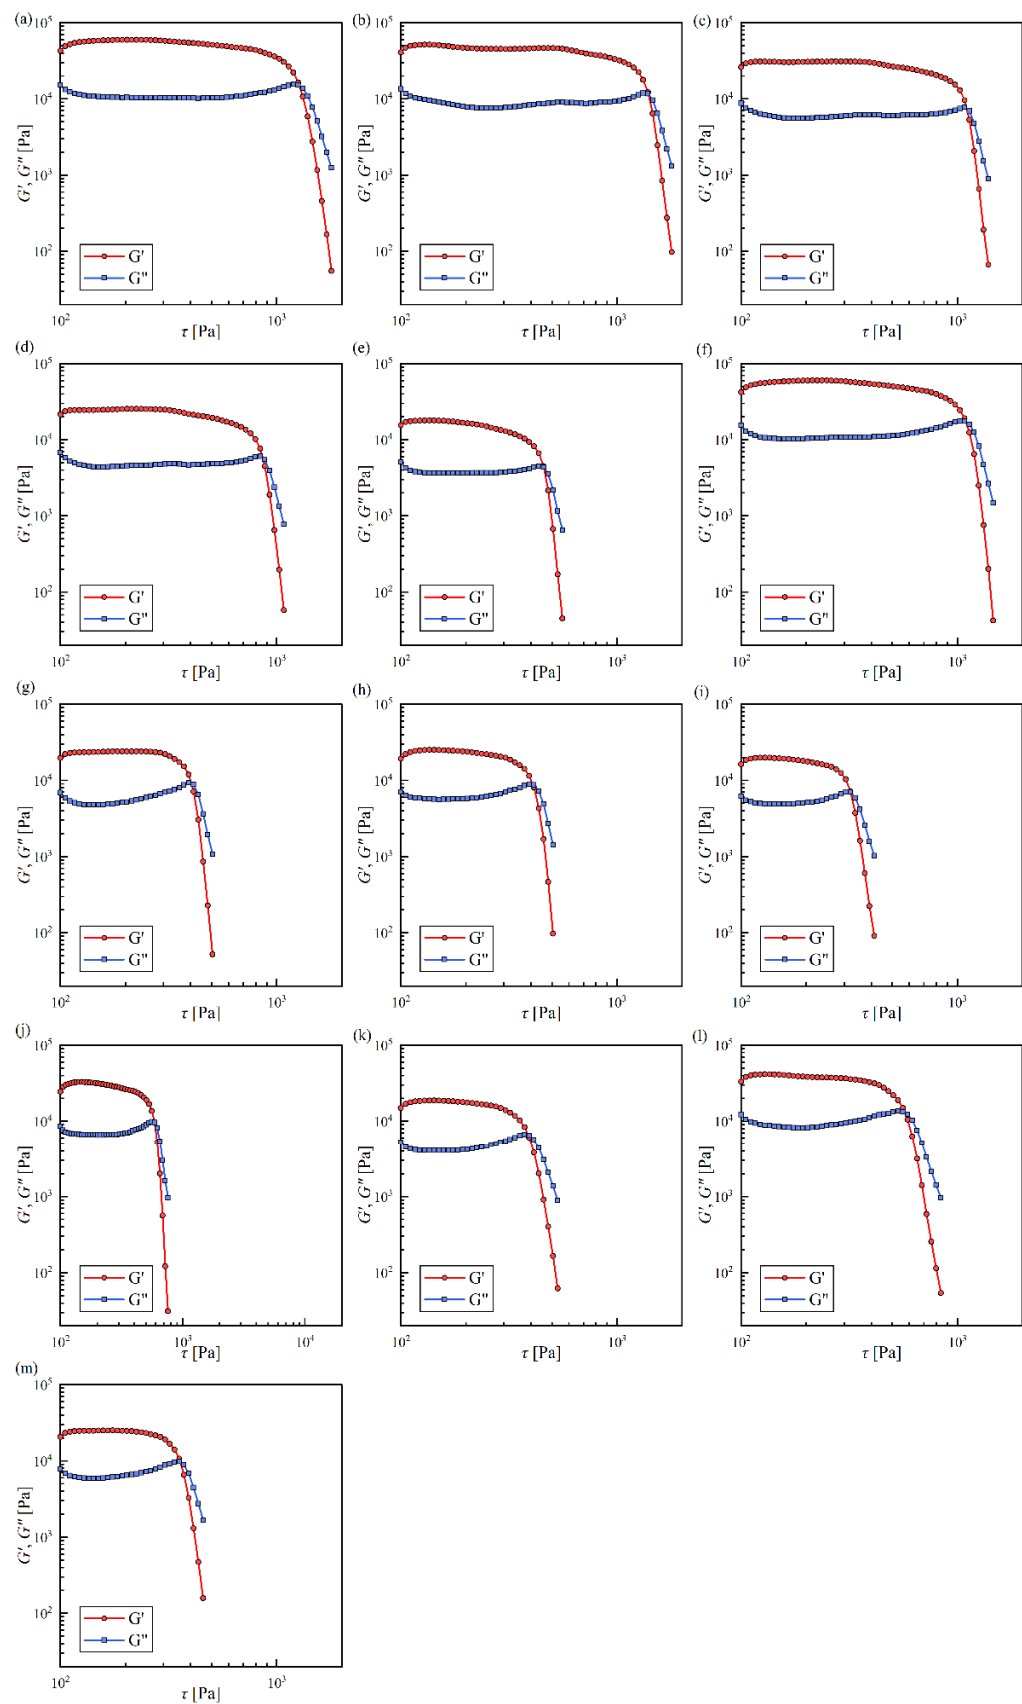

**Figure S2.** Storage and loss moduli measured by rheological measurement of prepared gels with 1.0 wt% of 12HSA with various solvents: (a) Hexane, (b) Heptane, (c) Octane, (d) Nonane, (e) Decane, (f) o-Xylene, (g) m-Xylene, (h) p-Xylene, (i) Styrene, (j) a-Methyl Styrene, (k) n-Butylbenzene, (l) Fulorobenzene, (m) 2-Methylfuran.

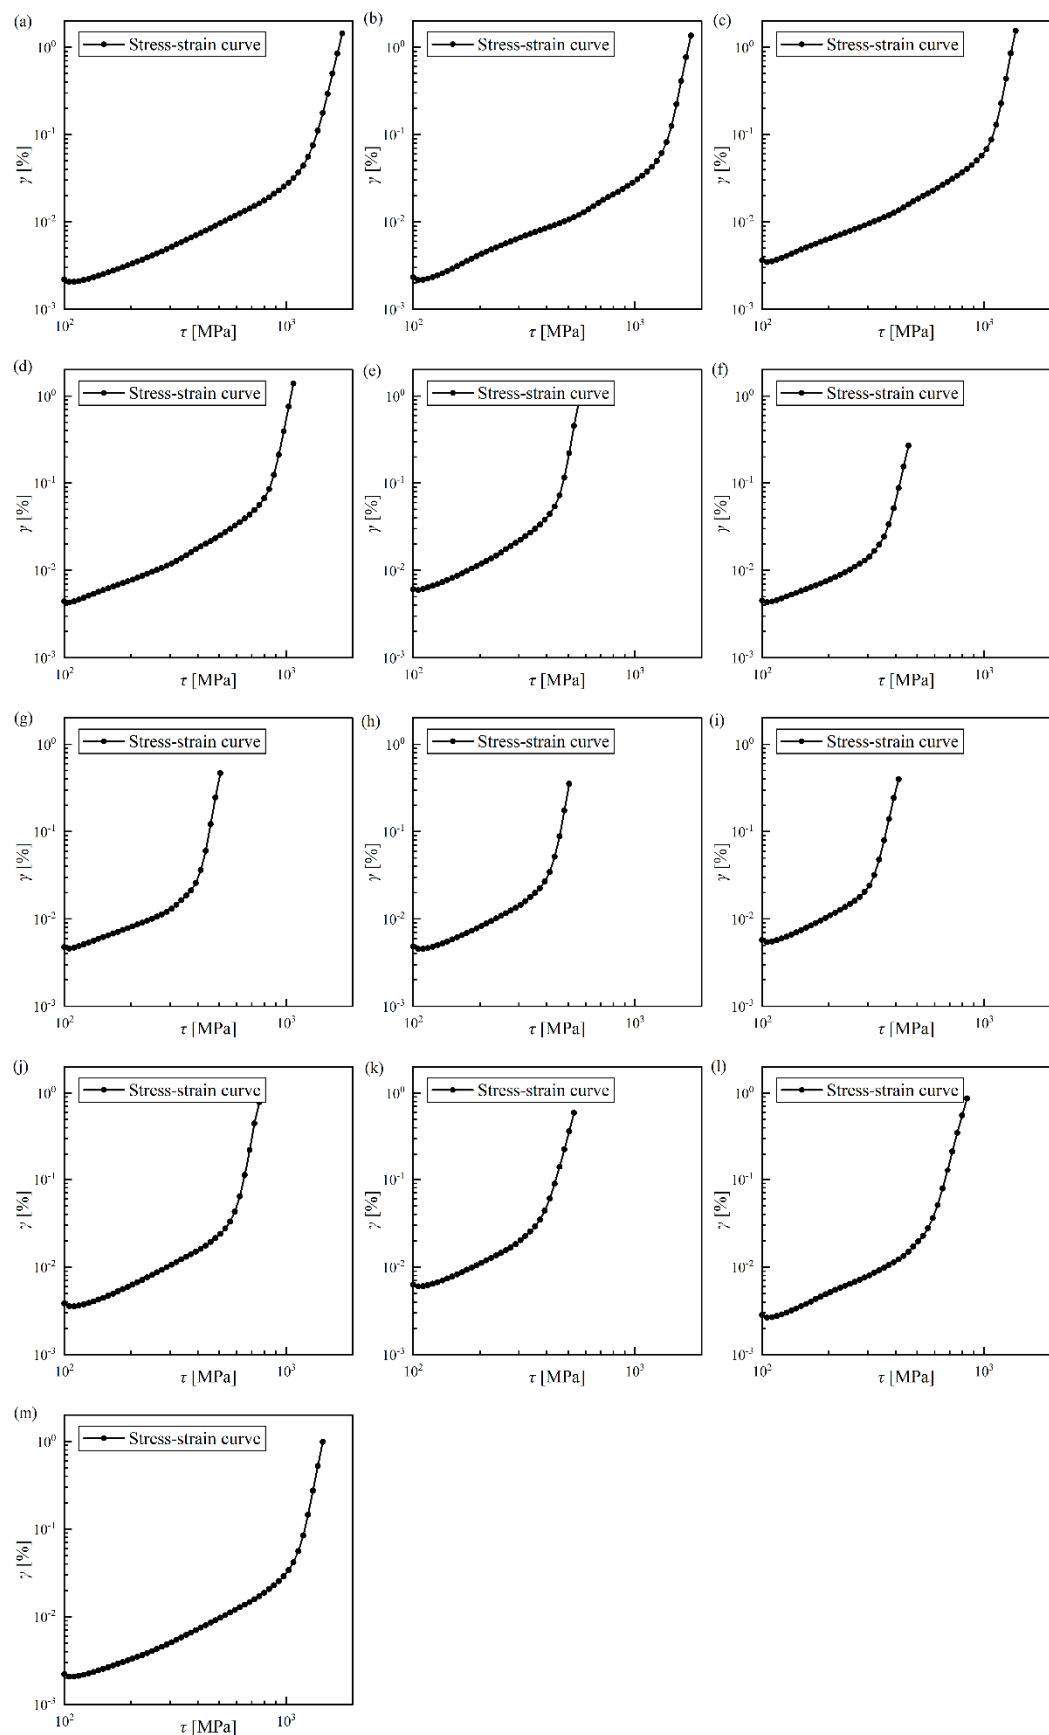

**Figure S3.** Stress-strain curve obtained by rheological measurements of prepared gels with 1.0 wt% of 12HSA with various solvents: (a) Hexane, (b) Heptane, (c) Octane, (d) Nonane, (e) Decane, (f) o-Xylene, (g) m-Xylene, (h) p-Xylene, (i) Styrene, (j) a-Methyl Styrene, (k) n-Butylbenzene, (l) Fulorobenzene, (m) 2-Methylfuran.

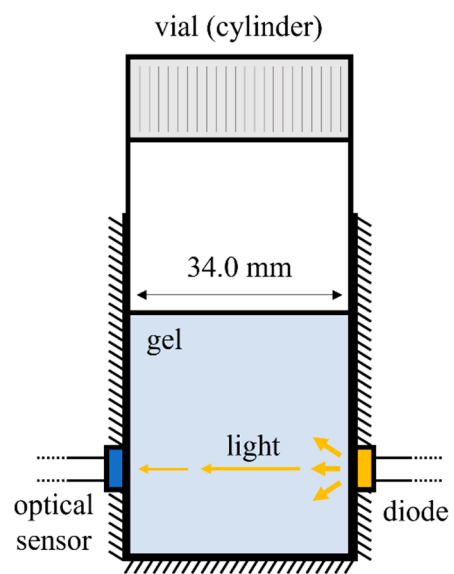

**Figure S4.** Schematic diagram of light transmittance measurement using diode and optical sensor.
